# Supplementary material for: A Novel Homozygous Founder Variant of RTN4IP1 in Two Consanguineous Saudi Families
Source: MDPI journal article supplement (doi:10.3390/cells11193154), 2022-10-07
Supplement: s1 [file s1]

**Supplementary Table S1. Summary of the clinical and genetic findings for patients with *RTN4IP1* mutations (The variants are ordered according to the base numbering on the cDNA)**

| Patient             | Mutation                | Protein                   | Respiratory chain activity | Epilepsy | Brain MRI                                                                                 | Developmental Delay | Other symptoms                                                       | References             |
|---------------------|-------------------------|---------------------------|----------------------------|----------|-------------------------------------------------------------------------------------------|---------------------|----------------------------------------------------------------------|------------------------|
| Case study          | c.307C>T, deletion      | p.Arg103Cys, deletion     | Unknown                    | No       | Unknown                                                                                   | No                  | No                                                                   | Jurkute et al., 2022   |
| Family I, II-3, F   | c.308G>A                | p.Arg103His               | CI and CIV deficits        | No       | Unknown                                                                                   | No                  | No                                                                   | Angebault et al., 2015 |
| Family I, II-4, M   | c.308G>A                | p.Arg103His               | CI and CIV deficits        | No       | Unknown                                                                                   | No                  | No                                                                   | Angebault et al., 2015 |
| Family II, II-1, M  | c.308G>A                | p.Arg103His               | Unknown                    | No       | Normal                                                                                    | No                  | No                                                                   | Angebault et al., 2015 |
| Family III, II-5, F | c.308G>A                | p.Arg103His               | Unknown                    | No       | Unknown                                                                                   | No                  | No                                                                   | Angebault et al., 2015 |
| Family IV, II-2, F  | c.308G>A;<br>c.601A>T   | p.Arg103His;<br>p.Lys201* | CI and CIV deficits        | Yes      | Thin optic tracts                                                                         | Mild                | Nystagmus, mild ataxia, learning disabilities                        | Angebault et al., 2015 |
| Family IV, II-3, F  | c.308G>A;<br>c.601A>T   | p.Arg103His;<br>p.Lys201* | CI and CIV deficits        | No       | Thin optic tracts                                                                         | Mild                | Nystagmus, mild ataxia, learning disabilities                        | Angebault et al., 2015 |
| II-1, M             | c.308G>A;<br>c.806+1G>A | p.Arg103His;<br>splicing  | Unknown                    | Yes      | Hypoplastic optic nerves                                                                  | No                  | Nystagmus, learning difficulty, transient hyperlactacidemia          | Okamoto et al., 2017   |
| II-2, M             | c.308G>A;<br>c.806+1G>A | p.Arg103His;<br>splicing  | Unknown                    | No       | Hypoplastic optic nerves                                                                  | Mild                | Nystagmus                                                            | Okamoto et al., 2017   |
| Family I, II-1      | c.308G>A                | p.Arg103His               | Unknown                    | No       | Normal                                                                                    | No                  | Nystagmus                                                            | Charif et al., 2017    |
| Family 2, II-1      | c.308G>A                | p.Arg103His               | Unknown                    | No       | Normal                                                                                    | No                  | No                                                                   | Charif et al., 2017    |
| Family 2, II-4      | c.308G>A                | p.Arg103His               | Unknown                    | No       | Normal                                                                                    | No                  | No                                                                   | Charif et al., 2017    |
| Family 3, II-1      | c.308G>A                | p.Arg103His               | Unknown                    | No       | Normal                                                                                    | No                  | No                                                                   | Charif et al., 2017    |
| Family 4, II-1      | c.308G>A                | p.Arg103His               | Unknown                    | No       | Unknown                                                                                   | No                  | No                                                                   | Charif et al., 2017    |
|                     |                         |                           |                            |          |                                                                                           |                     |                                                                      |                        |
| Case study          | c.308G>A                | p.Arg103His               | Unknown                    | No       | Isolated small subependymal heterotopia and asynchronous self-resolving midbrain lesions. | No                  | Nystagmus, myopia, mild intellectual disability, generalized chorea, | Giacomini et al., 2020 |
| Family 1, II-3&II-4 | c.308G>A                | p.Arg103His               | Unknown                    | No       | Unknown                                                                                   | No                  | No                                                                   | Meunier et al., 2021   |
| Family 2, II-5      | c.308G>A                | p.Arg103His               | Unknown                    | No       | Unknown                                                                                   | No                  | No                                                                   | Meunier et al., 2021   |

|                            |                         |                           |            |         |                                                                               |        |                                                                                                    |                       |
|----------------------------|-------------------------|---------------------------|------------|---------|-------------------------------------------------------------------------------|--------|----------------------------------------------------------------------------------------------------|-----------------------|
| Family 3, II-4&II-5, III-2 | c.308G>A                | p.Arg103His               | Unknown    | No      | Unknown                                                                       | No     | Nystagmus                                                                                          | Meunier et al., 2021  |
| Family 4, II-2&II-3        | c.308G>A;<br>c.601A>T   | p.Arg103His;<br>p.K201*   | Unknown    | No      | Unknown                                                                       | No     | No                                                                                                 | Meunier et al., 2021  |
| Case study                 | c.432G>A;<br>c.646 G>A  | p.W144X,<br>p.G216R       | Unknown    | No      | Normal                                                                        | No     | No                                                                                                 | Rajabian et al., 2021 |
| Family 5, II-1             | c.1084A>T               | p.Ile362Phe               | Unknown    | No      | Unknown                                                                       | No     | No                                                                                                 | Charif et al., 2017   |
| Family 6, II-4             | c.129G>A;<br>c.152A>G   | p.Trp51Cys;<br>p.Met43Ile | Unknown    | No      | Normal                                                                        | No     | No                                                                                                 | Charif et al., 2017   |
| Family 7, II-2             | c.313C>T                | p.Pro105Ser               | Unknown    | Yes     | Normal                                                                        | Severe | Elevated plasma lactate, poor feeding, nonverbal                                                   | Charif et al., 2017   |
| Family 8, II-1             | c.1067T>C               | p.Leu356Pro               | Unknown    | Yes     | Unknown                                                                       | Yes    | Hypotonia at birth, nystagmus, ataxia, lower extremity spasticity                                  | Charif et al., 2017   |
| Family 9, II-2             | c.432G>A;<br>c.962G>A   | p.Trp144*;<br>p.Gly321Glu | CI deficit | Yes     | T2 hyperintensities in thalami, subthalamic and dentate nuclei, and brainstem | Yes    | Elevated serum lactate and pyruvate, spastic tetraparesis, upper extremity dystonia, abnormal AEPs | Charif et al., 2017   |
| Family 10, II-1            | c.314C>A                | p.Pro105His               | CI deficit | Yes     | Cerebral atrophy                                                              | Yes    | Hypotonia, stridor                                                                                 | Charif et al., 2017   |
| Family 11, II-2            | c.500C>T;<br>c.806+1G>A | p.Ser167Phe;<br>splicing  | CI deficit | Unknown | T2 high signal change and swelling in posterolateral putamina                 |        | Elevated plasma lactate and alanine, poor feeding, tracheostomy                                    | Charif et al., 2017   |
| II-1, F                    | c.646G>A;<br>c.1162C>T  | p.Gly216Arg;<br>p.Arg388* | Unknown    | Yes     | Normal                                                                        | Mild   | Nystagmus, elevated serum lactate and pyruvate                                                     | Zou et al., 2019      |
| II-2, M                    | c.646G>A;<br>c.1162C>T  | p.Gly216Arg;<br>p.Arg388* | Unknown    | Yes     | Normal                                                                        | Mild   | Nystagmus, elevated serum lactate and pyruvate                                                     | Zou et al., 2019      |
| II-1, M                    | c.263T>G;<br>deletion   | p.Val88Gly;<br>deletion   | Unknown    | Yes     | Pituitary cysts, T2 hyperintensities                                          | Yes    | Nystagmus, ataxia, choreoathetosis, hypotonia, elevated plasma lactate                             | Present study         |
| Case study                 | c.263T>G                | p.Val88Gly                | Unknown    | Yes     | T2 signal abnormalities                                                       | Yes    | Nystagmus, ataxia, and Choreoathetosis                                                             | D’Gama et al., 2021   |

GenBank: NM\_032730; CI: Complex I, CIV: Complex IV, AEPs: auditory evoked potentials
